# Supplementary material for: Dysfunction of Calcyphosine-Like gene impairs retinal angiogenesis through the MYC axis and is associated with familial exudative vitreoretinopathy
Source: eLife journal article supplement (doi:10.7554/elife.96907), 2024-04-10
Supplement: fig2-figsupp1-data1 [file Raw unedited gels 3.pdf › Figure 2-figure supplement 1-source data 1/Raw unedited gels 3.pdf]

the 1990s, the number of people in the UK who are employed in the public sector has increased by 1.5 million, from 2.5 million in 1980 to 4 million in 1995 (Department of Health 1996).

There is a growing emphasis on the need to improve the efficiency of the public sector, and to ensure that the public sector is able to deliver the services that are required by the public. This has led to a number of initiatives, including the introduction of competition, the restructuring of public sector organisations, and the introduction of performance measures. The aim of these initiatives is to ensure that the public sector is able to deliver the services that are required by the public, in a cost-effective and efficient manner.

One of the key challenges facing the public sector is the need to improve the efficiency of the public sector. This is a complex task, and one that requires a number of different approaches. One of the key approaches is the introduction of competition. This involves the introduction of competition into the public sector, in order to ensure that the public sector is able to deliver the services that are required by the public, in a cost-effective and efficient manner.

Another key approach is the restructuring of public sector organisations. This involves the restructuring of public sector organisations, in order to ensure that the public sector is able to deliver the services that are required by the public, in a cost-effective and efficient manner. This may involve the merging of public sector organisations, or the restructuring of public sector organisations, in order to ensure that the public sector is able to deliver the services that are required by the public, in a cost-effective and efficient manner.

A third key approach is the introduction of performance measures. This involves the introduction of performance measures, in order to ensure that the public sector is able to deliver the services that are required by the public, in a cost-effective and efficient manner. This may involve the introduction of performance measures, in order to ensure that the public sector is able to deliver the services that are required by the public, in a cost-effective and efficient manner.

One of the key challenges facing the public sector is the need to improve the efficiency of the public sector. This is a complex task, and one that requires a number of different approaches. One of the key approaches is the introduction of competition. This involves the introduction of competition into the public sector, in order to ensure that the public sector is able to deliver the services that are required by the public, in a cost-effective and efficient manner.

Another key approach is the restructuring of public sector organisations. This involves the restructuring of public sector organisations, in order to ensure that the public sector is able to deliver the services that are required by the public, in a cost-effective and efficient manner. This may involve the merging of public sector organisations, or the restructuring of public sector organisations, in order to ensure that the public sector is able to deliver the services that are required by the public, in a cost-effective and efficient manner.

A third key approach is the introduction of performance measures. This involves the introduction of performance measures, in order to ensure that the public sector is able to deliver the services that are required by the public, in a cost-effective and efficient manner. This may involve the introduction of performance measures, in order to ensure that the public sector is able to deliver the services that are required by the public, in a cost-effective and efficient manner.

One of the key challenges facing the public sector is the need to improve the efficiency of the public sector. This is a complex task, and one that requires a number of different approaches. One of the key approaches is the introduction of competition. This involves the introduction of competition into the public sector, in order to ensure that the public sector is able to deliver the services that are required by the public, in a cost-effective and efficient manner.
