# Supplementary material for: Dysfunction of Calcyphosine-Like gene impairs retinal angiogenesis through the MYC axis and is associated with familial exudative vitreoretinopathy
Source: eLife journal article supplement (doi:10.7554/elife.96907), 2024-04-10
Supplement: fig2-figsupp1-data1 [file Raw unedited gels 4.pdf › Figure 2-figure supplement 1-source data 1/Raw unedited gels 4.pdf]

the 1990s, the number of people with a mental health problem has increased by 50% (Mental Health Foundation, 2000). The prevalence of mental health problems in the UK is estimated to be 10% (Mental Health Foundation, 2000).

There is a growing awareness of the need to address the needs of people with mental health problems. The Department of Health (2000) has set out a strategy for mental health care, which aims to improve the lives of people with mental health problems and to reduce the burden of mental illness on society. The strategy is based on three main principles: (1) to promote the recovery of people with mental health problems; (2) to provide a range of services to meet the needs of people with mental health problems; and (3) to ensure that people with mental health problems are treated with respect and dignity. The strategy also sets out a number of specific objectives, including: to reduce the number of people with mental health problems who are admitted to hospital; to improve the quality of care for people with mental health problems; and to ensure that people with mental health problems are given the opportunity to participate in decisions about their care.

One of the key challenges in implementing the strategy is to ensure that services are available to all people who need them. This is particularly true for people with mental health problems who are living in deprived areas. In these areas, there is often a lack of resources and a high level of need. This can make it difficult to provide the services that are needed to support people with mental health problems. One way to address this challenge is to develop community-based services. These services can provide a range of support and care for people with mental health problems, and they can be tailored to the needs of the local community. Community-based services can also help to reduce the burden of mental illness on society by providing a range of services that can help people to manage their condition and to live their lives more fully.

One of the key components of community-based services is the provision of support and care for people with mental health problems. This can include a range of services, such as: (1) psychological support; (2) social support; (3) practical support; and (4) medical support. These services can be provided by a range of professionals, including: (1) psychologists; (2) social workers; (3) nurses; and (4) doctors. The provision of support and care for people with mental health problems is a key part of the strategy, and it is essential to ensure that these services are available to all people who need them. This can be achieved by developing community-based services that are tailored to the needs of the local community.

Another key component of community-based services is the provision of opportunities for people with mental health problems to participate in decisions about their care. This is an important part of the strategy, and it is essential to ensure that people with mental health problems are given the opportunity to participate in decisions about their care. This can be achieved by developing community-based services that are tailored to the needs of the local community. Community-based services can also help to reduce the burden of mental illness on society by providing a range of services that can help people to manage their condition and to live their lives more fully.

One of the key challenges in implementing the strategy is to ensure that services are available to all people who need them. This is particularly true for people with mental health problems who are living in deprived areas. In these areas, there is often a lack of resources and a high level of need. This can make it difficult to provide the services that are needed to support people with mental health problems. One way to address this challenge is to develop community-based services. These services can provide a range of support and care for people with mental health problems, and they can be tailored to the needs of the local community. Community-based services can also help to reduce the burden of mental illness on society by providing a range of services that can help people to manage their condition and to live their lives more fully.
