# Supplementary material for: Dysfunction of Calcyphosine-Like gene impairs retinal angiogenesis through the MYC axis and is associated with familial exudative vitreoretinopathy
Source: eLife journal article supplement (doi:10.7554/elife.96907), 2024-04-10
Supplement: fig5-data2 [file Figure 5-source data 5 Raw unedited gels for Figure 5.pdf › Figure 5-source data 2. Raw unedited gels for Figure 5/Figure 5-source data 5 Raw unedited gels for Figure 5.pdf]

80
