# Supplementary material for: Dysfunction of Calcyphosine-Like gene impairs retinal angiogenesis through the MYC axis and is associated with familial exudative vitreoretinopathy
Source: eLife journal article supplement (doi:10.7554/elife.96907), 2024-04-10
Supplement: fig7-data2 [file Figure 7-source data 1 Raw unedited gels for Figure 7.pdf › Figure 7-source data 2. Raw unedited gels for Figure 7/Figure 7-source data 1 Raw unedited gels for Figure 7.pdf]

85

25.
