# Supplementary material for: Dysfunction of Calcyphosine-Like gene impairs retinal angiogenesis through the MYC axis and is associated with familial exudative vitreoretinopathy
Source: eLife. 2024 Sep 12;13:RP96907. doi: 10.7554/eLife.96907 (PMC11392532; doi:10.7554/eLife.96907)
Supplement: Supplementary file 1. [file elife-96907-supp1.xlsx]

## Sheet: Sheet1
Software	Variant	Prediction
Mutation Taster	R30X	disease causing: amino acid sequence changed protein features (might be) affected splice site changes
	L83F	disease causing: amino acid sequence changed protein features (might be) affected
Polyphen-2	R30X	-
	L83F	Possibly damaging with a score of 0.777 (sensitivity: 0.85; specificity: 0.92)
PROVEAN	R30X	Score:-13.38, prediction: deleterious
	L83F	Score:-2.51, prediction: deleterious
