# Supplementary material for: Dysfunction of Calcyphosine-Like gene impairs retinal angiogenesis through the MYC axis and is associated with familial exudative vitreoretinopathy
Source: eLife. 2024 Sep 12;13:RP96907. doi: 10.7554/eLife.96907 (PMC11392532; doi:10.7554/eLife.96907)
Supplement: Supplementary file 4. [file elife-96907-supp4.xlsx]

## Sheet: Sheet1
	List of the antibodies used in this study.
Name	Company	Catalog nubmer	Usage
Anti-CAPSL (Rabbit polyclonal)	Proteintech	17174-1-AP	WB (1:2000)
Anti-MCM2 (Rabbit polyclonal)	Cell Signaling Technology	3619	WB (1:2000)
Anti-MCM3 (Rabbit polyclonal)	Cell Signaling Technology	4012	WB (1:2000)
Anti-MCM4 (Rabbit polyclonal)	Cell Signaling Technology	3228	WB (1:2000)
Anti-MCM5 (Rabbit polyclonal)	Abcam	AB76023	WB (1:2000)
Anti-MCM7 (Rabbit polyclonal)	Cell Signaling Technology	3735	WB (1:2000)
Anti-E2F1 (Rabbit polyclonal)	Abcam	Ab92513	WB (1:2000)
Anti-CyclinD1 (Rabbit polyclonal)	Cell Signaling Technology	55506	WB (1:2000)
Anti-CyclinD2 (Rabbit polyclonal)	Cell Signaling Technology	3741	WB (1:2000)
Anti-CyclinD3 (Rabbit polyclonal)	Invitrogen	AB_2809647	WB (1:2000)
Anti-CyclinE1 (Rabbit polyclonal)	Cell Signaling Technology	28808	WB (1:2000)
Anti-CDK4 (Rabbit polyclonal)	Cell Signaling Technology	127903	WB (1:2000)
Anti-PCNA (Rabbit polyclonal)	ABclonal	A12427	WB (1:2000)
Anti-CDC42 (Rabbit polyclonal)	Proteintech	0155-1-AP	WB (1:2000)
Anti-RHOA (Rabbit polyclonal)	ABclonal	A4855	WB (1:2000)
Anti-Rac1 (Rabbit polyclonal)	ABclonal	A7720	WB (1:2000)
Anti-MYL9 (Rabbit polyclonal)	ABclonal	A8738	WB (1:2000)
Anti-P-MYL9-S19 (Rabbit polyclonal)	ABclonal	A8738	WB (1:2000)
Isolectin-B4-Alexa488	Thermo Fisher	I21411	IHC (1:200)
Anti-VEGF (Goat polyclonal)	R＆D System	AF-493-NA	IHC (1:200)
Anti-Collagen IV (Goat polyclonal)	Millipore Sigma	AB756P	IHC (1:200)
Anti-Fibronectin-1 (Rabbit polyclonal)	Millipore Sigma	F3648	IHC (1:200)
Anti-NG2 (Rabbit polyclonal)	Millipore Sigma	AB5320	IHC (1:200)
Anti-Desmin (Rabbit polyclonal)	Abcam	AB15200	IHC (1:200)
Anti-ERG (Rabbit polyclonal)	Abcam	AB92513	IHC (1:200)
Anti-GFAP (Rabbit polyclonal)	Cell Signaling Technology	80788	IHC (1:200)
