# Supplementary material for: Dysfunction of Calcyphosine-Like gene impairs retinal angiogenesis through the MYC axis and is associated with familial exudative vitreoretinopathy
Source: eLife. 2024 Sep 12;13:RP96907. doi: 10.7554/eLife.96907 (PMC11392532; doi:10.7554/eLife.96907)
Supplement: Supplementary file 5. [file elife-96907-supp5.xlsx]

## Sheet: Sheet1
	List of the PCR primers used in this study.
Gene name	Forward (5’-3’)	Reverse (5’-3’)
Mouse Gapdh	TGTGTCCGTCGTGGATCTGA	TTGCTGTTGAAGTCGCAGGAG
Capsl	GGACTTGGCAGAGTGTTTCG	GGACTTGGCAGAGTGTTTCG
Myc	TCAGACACGGAGGAAAACGA	CGTCTGCTTGAATGGACAGG
E2f1	TGCTGCAGAACCTATGGCTA	CAAGAAGCGTTTGGTGGTCA
Ccna2	TGTCACTGCTGGTCCTTCAT	TCCGGGTAAAGAGACAGCTG
pcna	GTGGAGCAACTTGGAATCCC	GGTTACCGCCTCCTCTTCTT
Prps2	TGGGCCAGCTATTTCCAGAA	TGGGACATGGCTGAACAGAT
Mcm2	AATGACCAGGCACGGACCAG	AGAAGGTCAGTGAAGGGTCG
Mcm3	TGGCCTGTCTGTCTACAAGG	CCCACCACCTGTATTCTGT
Mcm4	TTCCAATGCCAAGTCTGTGC	ATAGTGTGAGGTGTCTGCCC
Mcm5	CAGCAGACCATCTCCATTGC	GGCTAGCATCATGTCCCTCT
Mcm7	TCGCTGCTGTCCTCCGAGTCC	GGTTTGCCTCTTCTCCACAGAC
Human GAPDH	CCATGGGTGGAATCATATTGGA	TCAACGGATTTGGTCGTATTGG
CAPSL	GCCAAGAAAAAGCTCACCAC	CTTTTTCCATGACCACAGCA
MYC	AACACACAACGTCTTGGAGC	GCACAAGAGTTCCGTAGCTG
GFP	ACGTAAACGGCCACAAGTTC	AAGTCGTGCTGCTTCATGTG
