# Supplementary figures and images for: Dysfunction of Calcyphosine-Like gene impairs retinal angiogenesis through the MYC axis and is associated with familial exudative vitreoretinopathy
Source: eLife journal article supplement (doi:10.7554/elife.96907), 2024-04-10

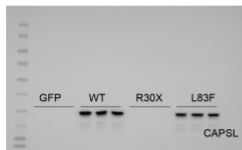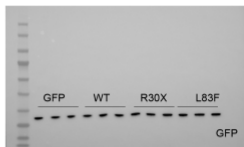

Supplement: fig1-data1 [file Figure 1-source data1 uncroped and labeled gels for Figure 1.pdf › Figure 1-source data 1. Uncroped and labelled gels for Figure 1/Figure 1-source data1 uncroped and labeled gels for Figure 1.pdf]

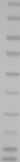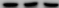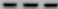

Supplement: fig1-data2 [file Figure 1-source data Raw unedited gel 1 for Figure 1.pdf › Figure 1-source data 2. Raw unedited gels for Figure 1/Figure 1-source data Raw unedited gel 1 for Figure 1.pdf]

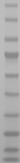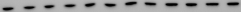

Supplement: fig1-data2 [file Figure 1-source data raw unedited gel2 for Figure 1.pdf › Figure 1-source data 2. Raw unedited gels for Figure 1/Figure 1-source data raw unedited gel2 for Figure 1.pdf]

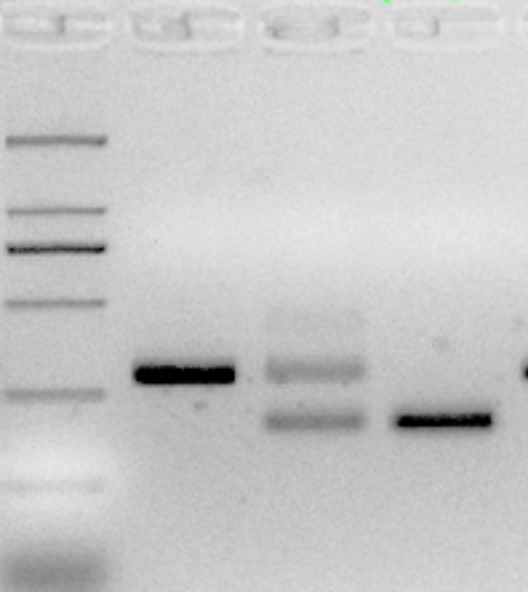

Supplement: fig2-figsupp1-data1 [file Raw unedited gels 1.pdf › Figure 2-figure supplement 1-source data 1/Raw unedited gels 1.pdf]

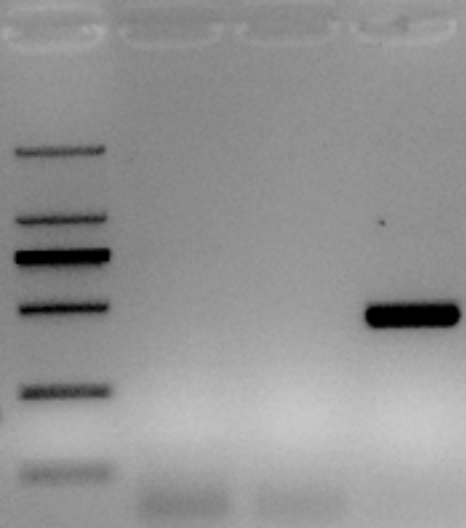

Supplement: fig2-figsupp1-data1 [file Raw unedited gels 2.pdf › Figure 2-figure supplement 1-source data 1/Raw unedited gels 2.pdf]

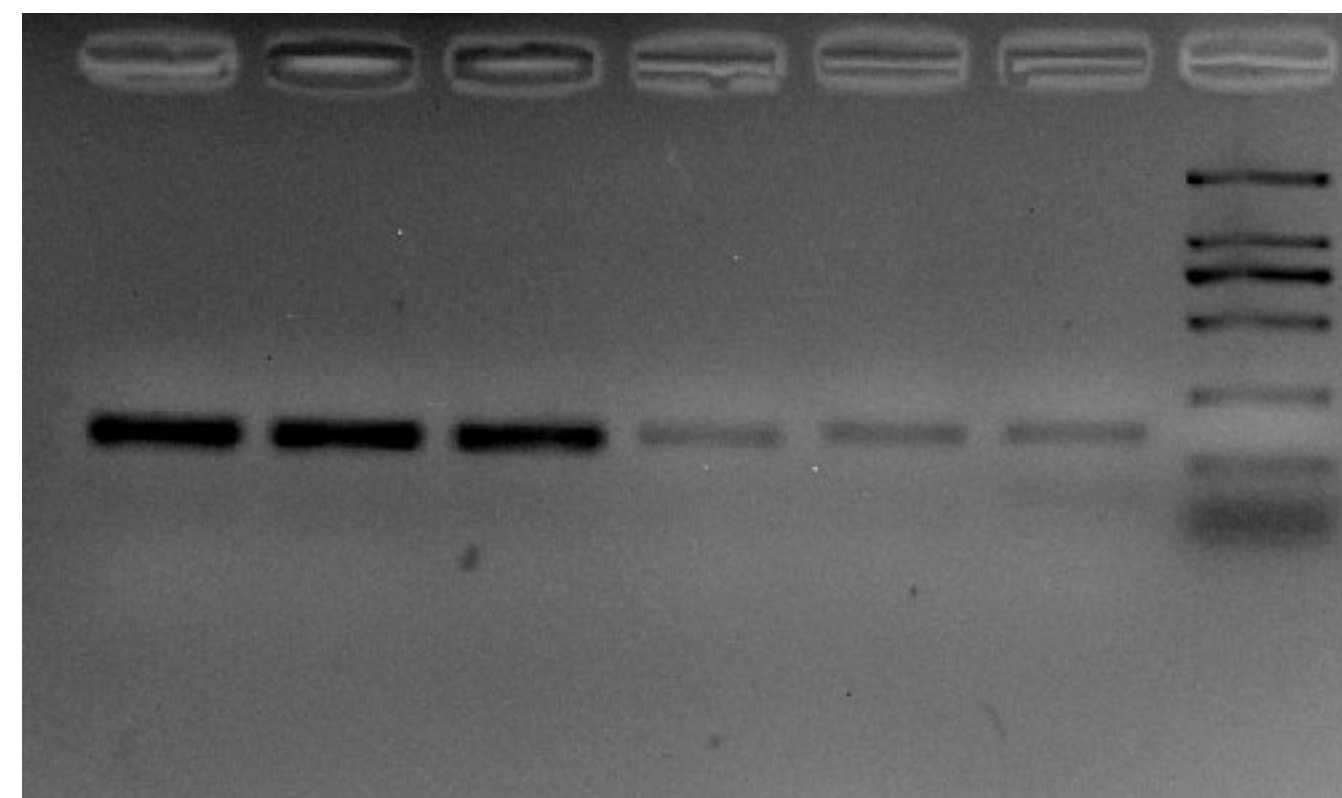

Supplement: fig2-figsupp1-data1 [file Raw unedited gels 5.pdf › Figure 2-figure supplement 1-source data 1/Raw unedited gels 5.pdf]

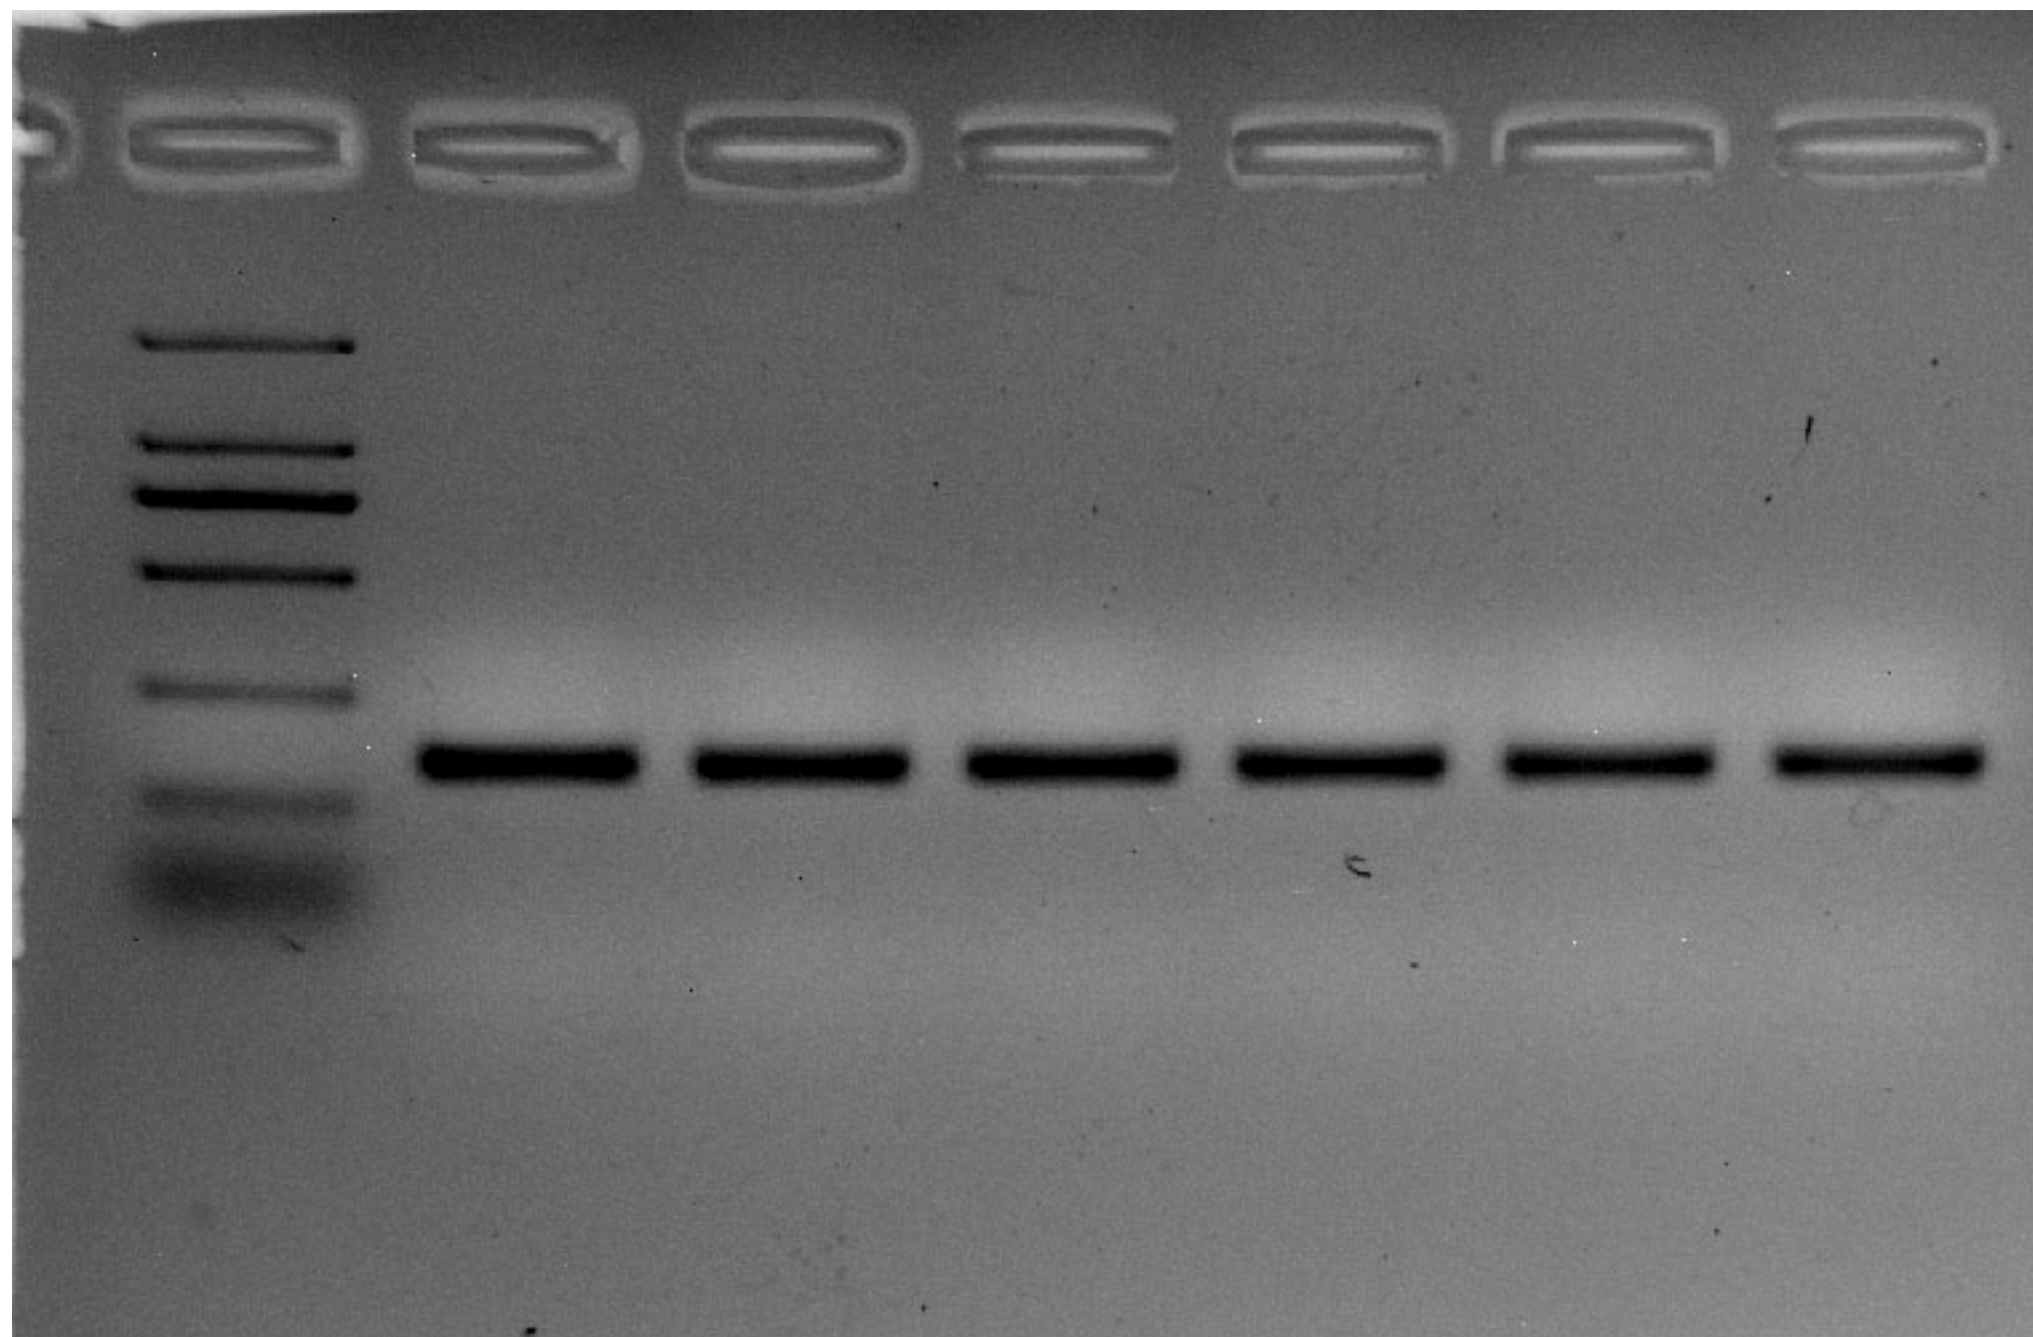

Supplement: fig2-figsupp1-data1 [file Raw unedited gels 6.pdf › Figure 2-figure supplement 1-source data 1/Raw unedited gels 6.pdf]

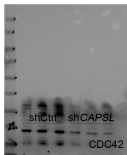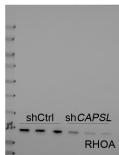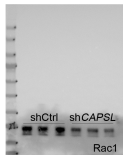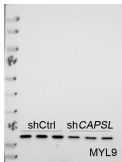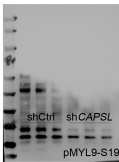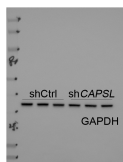

Supplement: fig5-data1 [file Figure 5-source data1 uncroped and labeled gels for Figure 5.pdf › Figure 5-source data 1. Uncroped and labelled gels for Figure 5/Figure 5-source data1 uncroped and labeled gels for Figure 5.pdf]

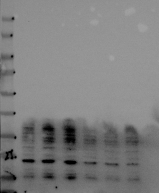

Supplement: fig5-data2 [file Figure 5-source data 1 Raw unedited gels for Figure 5.pdf › Figure 5-source data 2. Raw unedited gels for Figure 5/Figure 5-source data 1 Raw unedited gels for Figure 5.pdf]

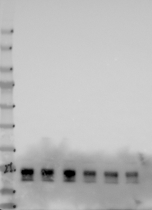

Supplement: fig5-data2 [file Figure 5-source data 3 Raw unedited gels for Figure 5.pdf › Figure 5-source data 2. Raw unedited gels for Figure 5/Figure 5-source data 3 Raw unedited gels for Figure 5.pdf]

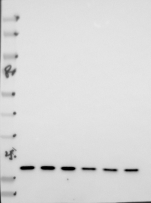

Supplement: fig5-data2 [file Figure 5-source data 4 Raw unedited gels for Figure 5.pdf › Figure 5-source data 2. Raw unedited gels for Figure 5/Figure 5-source data 4 Raw unedited gels for Figure 5.pdf]

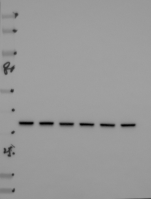

Supplement: fig5-data2 [file Figure 5-source data 6 Raw unedited gels for Figure 5.pdf › Figure 5-source data 2. Raw unedited gels for Figure 5/Figure 5-source data 6 Raw unedited gels for Figure 5.pdf]

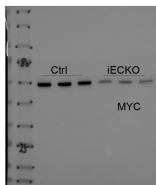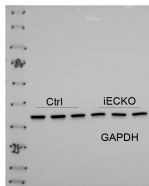

Supplement: fig6-figsupp2-data1 [file uncroped and labeled gels.pdf › Figure 6-figure supplement 2-source data 1. Uncroped and labelled gels for Figure 6-figure supplement 2/uncroped and labeled gels.pdf]

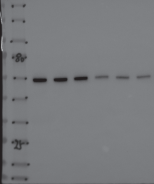

Supplement: fig6-figsupp2-data2 [file Raw unedited gels 1.pdf › Figure 6-figure supplement 2-source data 2/Raw unedited gels 1.pdf]

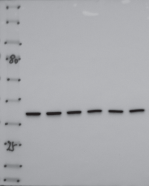

Supplement: fig6-figsupp2-data2 [file Raw unedited gels 2.pdf › Figure 6-figure supplement 2-source data 2/Raw unedited gels 2.pdf]

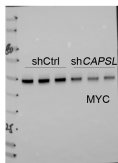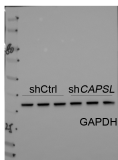

Supplement: fig7-data1 [file Figure 7-source data1 uncroped and labeled gels for Figure 7.pdf › Figure 7-source data 1. Uncroped and labelled gels for Figure 7/Figure 7-source data1 uncroped and labeled gels for Figure 7.pdf]

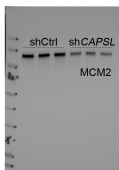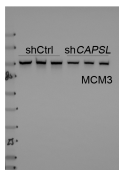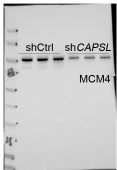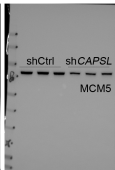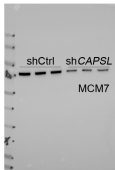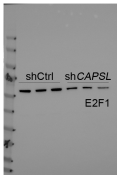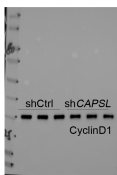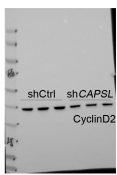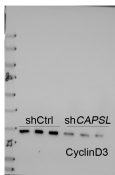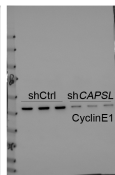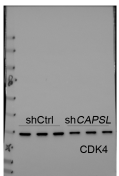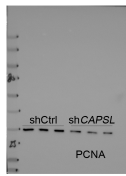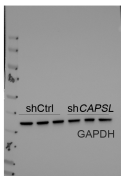

Supplement: fig7-data1 [file Figure 7-source data2 uncroped and labeled gels for Figure 7.pdf › Figure 7-source data 1. Uncroped and labelled gels for Figure 7/Figure 7-source data2 uncroped and labeled gels for Figure 7.pdf]

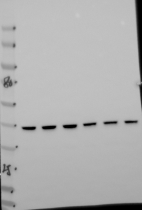

Supplement: fig7-data2 [file Figure 7-source data 10 Raw unedited gels for Figure 7.pdf › Figure 7-source data 2. Raw unedited gels for Figure 7/Figure 7-source data 10 Raw unedited gels for Figure 7.pdf]

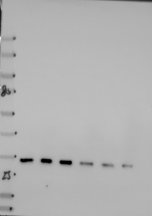

Supplement: fig7-data2 [file Figure 7-source data 11 Raw unedited gels for Figure 7.pdf › Figure 7-source data 2. Raw unedited gels for Figure 7/Figure 7-source data 11 Raw unedited gels for Figure 7.pdf]

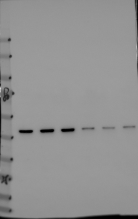

Supplement: fig7-data2 [file Figure 7-source data 12 Raw unedited gels for Figure 7.pdf › Figure 7-source data 2. Raw unedited gels for Figure 7/Figure 7-source data 12 Raw unedited gels for Figure 7.pdf]

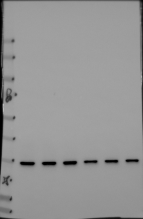

Supplement: fig7-data2 [file Figure 7-source data 13 Raw unedited gels for Figure 7.pdf › Figure 7-source data 2. Raw unedited gels for Figure 7/Figure 7-source data 13 Raw unedited gels for Figure 7.pdf]

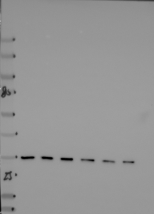

Supplement: fig7-data2 [file Figure 7-source data 14 Raw unedited gels for Figure 7.pdf › Figure 7-source data 2. Raw unedited gels for Figure 7/Figure 7-source data 14 Raw unedited gels for Figure 7.pdf]

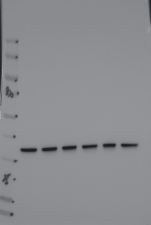

Supplement: fig7-data2 [file Figure 7-source data 15 Raw unedited gels for Figure 7.pdf › Figure 7-source data 2. Raw unedited gels for Figure 7/Figure 7-source data 15 Raw unedited gels for Figure 7.pdf]

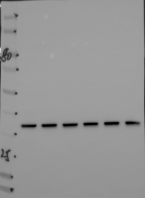

Supplement: fig7-data2 [file Figure 7-source data 2 Raw unedited gels for Figure 7.pdf › Figure 7-source data 2. Raw unedited gels for Figure 7/Figure 7-source data 2 Raw unedited gels for Figure 7.pdf]

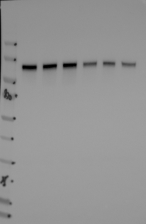

Supplement: fig7-data2 [file Figure 7-source data 3 Raw unedited gels for Figure 7.pdf › Figure 7-source data 2. Raw unedited gels for Figure 7/Figure 7-source data 3 Raw unedited gels for Figure 7.pdf]

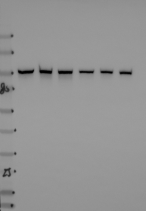

Supplement: fig7-data2 [file Figure 7-source data 4 Raw unedited gels for Figure 7.pdf › Figure 7-source data 2. Raw unedited gels for Figure 7/Figure 7-source data 4 Raw unedited gels for Figure 7.pdf]

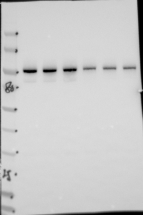

Supplement: fig7-data2 [file Figure 7-source data 5 Raw unedited gels for Figure 7.pdf › Figure 7-source data 2. Raw unedited gels for Figure 7/Figure 7-source data 5 Raw unedited gels for Figure 7.pdf]

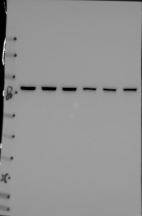

Supplement: fig7-data2 [file Figure 7-source data 6 Raw unedited gels for Figure 7.pdf › Figure 7-source data 2. Raw unedited gels for Figure 7/Figure 7-source data 6 Raw unedited gels for Figure 7.pdf]

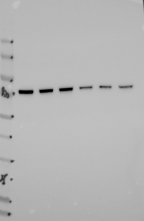

Supplement: fig7-data2 [file Figure 7-source data 7 Raw unedited gels for Figure 7.pdf › Figure 7-source data 2. Raw unedited gels for Figure 7/Figure 7-source data 7 Raw unedited gels for Figure 7.pdf]

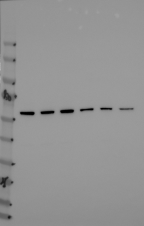

Supplement: fig7-data2 [file Figure 7-source data 8 Raw unedited gels for Figure 7.pdf › Figure 7-source data 2. Raw unedited gels for Figure 7/Figure 7-source data 8 Raw unedited gels for Figure 7.pdf]

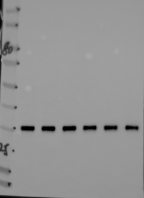

Supplement: fig7-data2 [file Figure 7-source data 9 Raw unedited gels for Figure 7.pdf › Figure 7-source data 2. Raw unedited gels for Figure 7/Figure 7-source data 9 Raw unedited gels for Figure 7.pdf]
